# Supplementary material for: Visualization of the in situ distribution of contents and hydrogen bonding states of cellular level water in apple tissues by confocal Raman microscopy
Source: Royal Society of Chemistry journal article supplement (doi:10.1039/c9an01743g), 2019-11-20
Supplement: c9an01743g1.pdf [file c9an01743g1.pdf]

## Supporting Information

### Visualization of the In-situ Distribution of Contents and Hydrogen Bonding States of Cellular level Water in Apple Tissues by Confocal Raman Microscopy

Dongmei Li<sup>a, b, c</sup>, Zhiwei Zhu<sup>a, b, c</sup>, Da-Wen Sun<sup>a, b, c, d, \*</sup>

<sup>a</sup> School of Food Science and Engineering, South China University of Technology, Guangzhou 510641, China

<sup>b</sup> Academy of Contemporary Food Engineering, South China University of Technology, Guangzhou Higher Education Mega Center, Guangzhou 510006, China

<sup>c</sup> Engineering and Technological Research Centre of Guangdong Province on Intelligent Sensing and Process Control of Cold Chain Foods, Guangzhou Higher Education Mega Centre, Guangzhou 510006, China

<sup>d</sup> Food Refrigeration and Computerized Food Technology (FRCFT), Agriculture and Food Science Centre, University College Dublin, National University of Ireland, Belfield, Dublin 4, Ireland

---

\* School of Food Science and Engineering, South China University of Technology, Guangzhou 510641, China, E-mail: dawen.sun@ucd.ie; URLs: [www.ucd.ie/refrig](http://www.ucd.ie/refrig), [www.ucd.ie/sun](http://www.ucd.ie/sun).

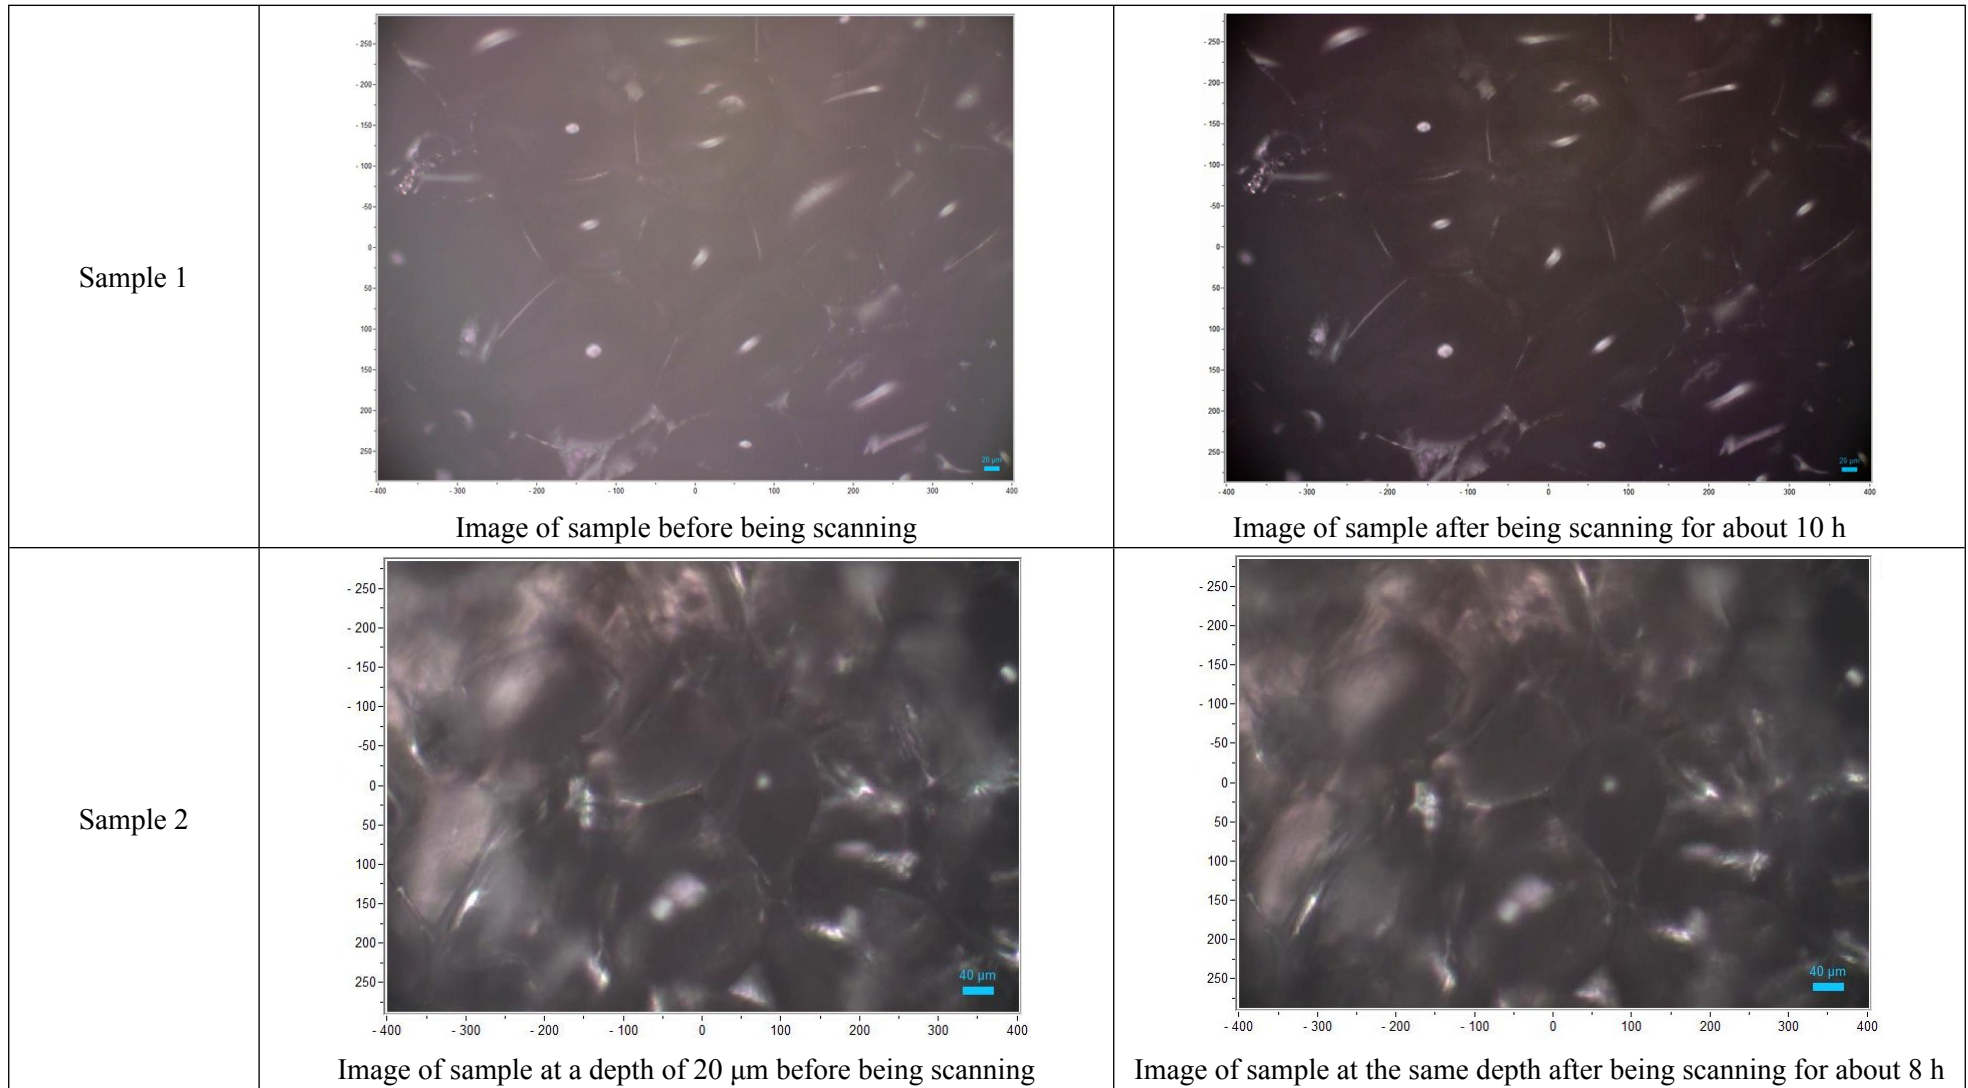

Sample 3

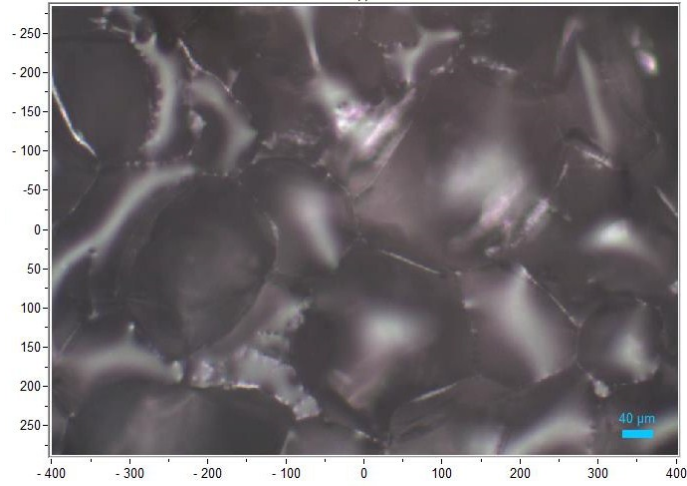

Image of sample before being scanning

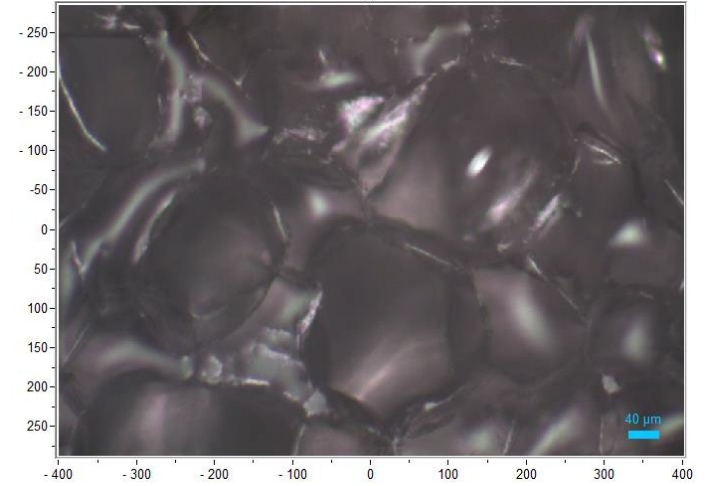

Image of sample after being scanning for about 4.5 h

Sample 4

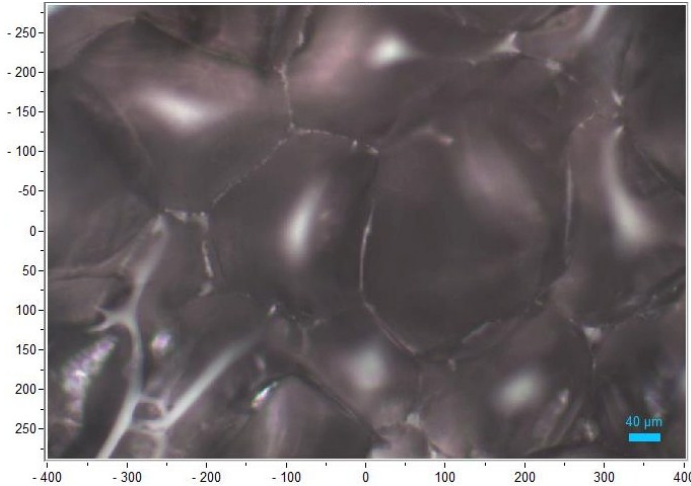

Image of sample before being scanning

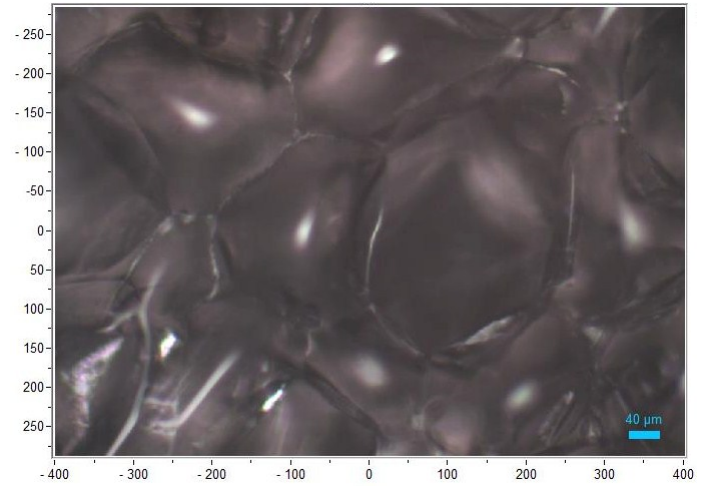

Image of sample after being scanning for about 4 h

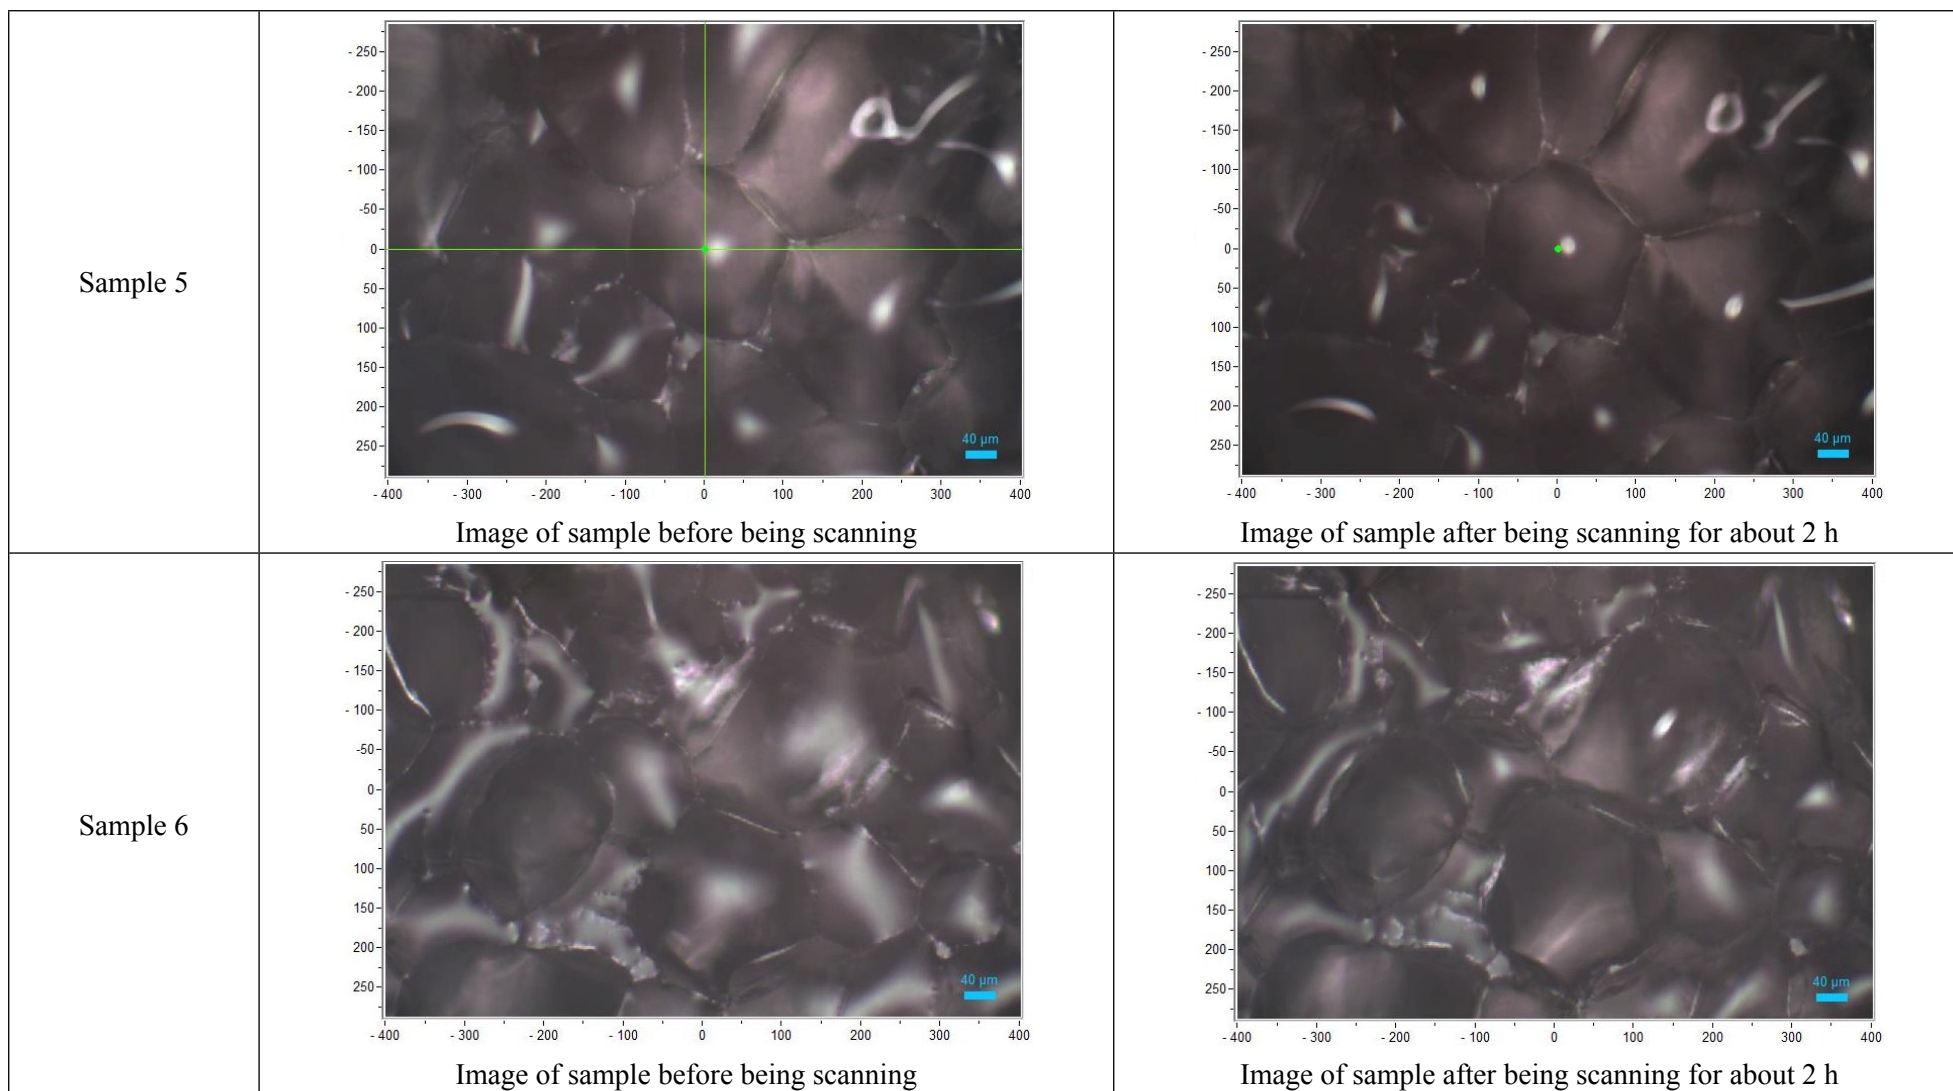

Fig.S1 Comparison of images of samples before and after being scanning by CRM.

Table S1. The fitting results of the Raman spectra of the deionized water in each scanning, including the position and area of each sub-peak and the overlapping peak.

| No | Peak position             |                           |                            |                           |                           | Area ratio of<br>Peak III and<br>Peak II | Number of<br>hydrogen bonds<br>of each water<br>molecule | Average<br>coefficient of<br>determination |
|----|---------------------------|---------------------------|----------------------------|---------------------------|---------------------------|------------------------------------------|----------------------------------------------------------|--------------------------------------------|
|    | Peak I /cm <sup>-1</sup>  | Peak II /cm <sup>-1</sup> | Peak III /cm <sup>-1</sup> | Peak IV /cm <sup>-1</sup> | Peak V /cm <sup>-1</sup>  |                                          |                                                          |                                            |
| 1  | 3069.76±4.86 <sup>a</sup> | 3218.80±0.82 <sup>a</sup> | 3408.98±2.22 <sup>a</sup>  | 3541.46±3.60 <sup>a</sup> | 3630.04±0.85 <sup>a</sup> | 1.68±0.01 <sup>a</sup>                   | 2.69±0.00 <sup>a</sup>                                   | 0.99997                                    |
| 2  | 3071.99±4.01 <sup>a</sup> | 3219.75±1.10 <sup>a</sup> | 3408.88±4.92 <sup>a</sup>  | 3540.75±4.75 <sup>a</sup> | 3630.48±2.47 <sup>a</sup> | 1.68±0.01 <sup>a</sup>                   | 2.69±0.00 <sup>a</sup>                                   | 0.99997                                    |
| 3  | 3072.82±6.99 <sup>a</sup> | 3218.57±0.86 <sup>a</sup> | 3408.38±5.65 <sup>a</sup>  | 3540.54±4.43 <sup>a</sup> | 3629.62±2.17 <sup>a</sup> | 1.68±0.02 <sup>a</sup>                   | 2.69±0.01 <sup>a</sup>                                   | 0.99996                                    |
| 4  | 3067.43±4.16 <sup>a</sup> | 3218.92±1.03 <sup>a</sup> | 3410.10±1.58 <sup>a</sup>  | 3543.46±2.74 <sup>a</sup> | 3630.32±0.94 <sup>a</sup> | 1.69±0.01 <sup>a</sup>                   | 2.69±0.00 <sup>a</sup>                                   | 0.99997                                    |
| 5  | 3070.12±6.95 <sup>a</sup> | 3219.26±0.90 <sup>a</sup> | 3410.05±3.42 <sup>a</sup>  | 3543.42±5.71 <sup>a</sup> | 3630.21±1.62 <sup>a</sup> | 1.68±0.00 <sup>a</sup>                   | 2.69±0.00 <sup>a</sup>                                   | 0.99997                                    |
| 6  | 3070.91±4.80 <sup>a</sup> | 3217.96±2.06 <sup>a</sup> | 3407.38±4.45 <sup>a</sup>  | 3538.96±5.75 <sup>a</sup> | 3629.11±1.35 <sup>a</sup> | 1.67±0.02 <sup>a</sup>                   | 2.69±0.00 <sup>a</sup>                                   | 0.99995                                    |
| 7  | 3068.01±4.17 <sup>a</sup> | 3215.98±1.49 <sup>a</sup> | 3409.17±2.07 <sup>a</sup>  | 3542.93±1.97 <sup>a</sup> | 3630.27±0.67 <sup>a</sup> | 1.64±0.02 <sup>a</sup>                   | 2.69±0.00 <sup>a</sup>                                   | 0.99994                                    |
| 8  | 3068.59±4.16 <sup>a</sup> | 3216.04±1.64 <sup>a</sup> | 3406.78±2.41 <sup>a</sup>  | 3539.90±2.99 <sup>a</sup> | 3629.18±0.76 <sup>a</sup> | 1.64±0.01 <sup>a</sup>                   | 2.69±0.00 <sup>a</sup>                                   | 0.99994                                    |
| 9  | 3067.38±7.42 <sup>a</sup> | 3216.56±2.94 <sup>a</sup> | 3406.49±3.54 <sup>a</sup>  | 3537.63±3.01 <sup>a</sup> | 3628.63±0.51 <sup>a</sup> | 1.63±0.01 <sup>a</sup>                   | 2.69±0.01 <sup>a</sup>                                   | 0.99993                                    |
| 10 | 3069.59±5.01 <sup>a</sup> | 3217.33±5.44 <sup>a</sup> | 3406.57±6.74 <sup>a</sup>  | 3538.47±6.65 <sup>a</sup> | 3628.11±1.79 <sup>a</sup> | 1.64±0.02 <sup>a</sup>                   | 2.69±0.01 <sup>a</sup>                                   | 0.99993                                    |
| 11 | 3069.07±5.11 <sup>a</sup> | 3217.87±1.51 <sup>a</sup> | 3409.15±4.70 <sup>a</sup>  | 3541.77±6.42 <sup>a</sup> | 3629.27±1.57 <sup>a</sup> | 1.70±0.03 <sup>a</sup>                   | 2.69±0.01 <sup>a</sup>                                   | 0.99996                                    |
| 12 | 3073.74±6.69 <sup>a</sup> | 3217.04±1.19 <sup>a</sup> | 3405.39±3.12 <sup>a</sup>  | 3538.19±5.01 <sup>a</sup> | 3628.76±1.57 <sup>a</sup> | 1.69±0.02 <sup>a</sup>                   | 2.69±0.00 <sup>a</sup>                                   | 0.99996                                    |
| 13 | 3071.65±3.95 <sup>a</sup> | 3217.88±0.94 <sup>a</sup> | 3407.84±2.82 <sup>a</sup>  | 3539.74±5.33 <sup>a</sup> | 3629.00±1.79 <sup>a</sup> | 1.67±0.02 <sup>a</sup>                   | 2.70±0.01 <sup>a</sup>                                   | 0.99994                                    |
| 14 | 3071.42±3.39 <sup>a</sup> | 3217.64±0.87 <sup>a</sup> | 3407.73±2.98 <sup>a</sup>  | 3541.93±5.09 <sup>a</sup> | 3629.97±1.08 <sup>a</sup> | 1.68±0.01 <sup>a</sup>                   | 2.70±0.00 <sup>a</sup>                                   | 0.99994                                    |

|         |                           |                           |                           |                           |                           |                        |                        |         |
|---------|---------------------------|---------------------------|---------------------------|---------------------------|---------------------------|------------------------|------------------------|---------|
| 15      | 3076.03±5.23 <sup>a</sup> | 3217.58±0.29 <sup>a</sup> | 3406.76±4.83 <sup>a</sup> | 3540.68±4.62 <sup>a</sup> | 3629.97±1.55 <sup>a</sup> | 1.66±0.01 <sup>a</sup> | 2.70±0.00 <sup>a</sup> | 0.99994 |
| 16      | 3073.16±3.61 <sup>a</sup> | 3218.69±1.42 <sup>a</sup> | 3405.55±4.28 <sup>a</sup> | 3537.07±2.71 <sup>a</sup> | 3629.10±1.62 <sup>a</sup> | 1.68±0.01 <sup>a</sup> | 2.70±0.01 <sup>a</sup> | 0.99995 |
| 17      | 3069.18±5.00 <sup>a</sup> | 3217.46±0.72 <sup>a</sup> | 3407.92±3.95 <sup>a</sup> | 3541.92±5.94 <sup>a</sup> | 3630.03±1.46 <sup>a</sup> | 1.69±0.01 <sup>a</sup> | 2.70±0.00 <sup>a</sup> | 0.99994 |
| 18      | 3068.68±4.73 <sup>a</sup> | 3217.40±0.53 <sup>a</sup> | 3408.99±4.75 <sup>a</sup> | 3544.40±2.51 <sup>a</sup> | 3630.72±1.49 <sup>a</sup> | 1.69±0.01 <sup>a</sup> | 2.69±0.00 <sup>a</sup> | 0.99994 |
| 19      | 3075.23±3.68 <sup>a</sup> | 3217.44±0.91 <sup>a</sup> | 3405.48±3.33 <sup>a</sup> | 3537.57±4.42 <sup>a</sup> | 3628.79±0.78 <sup>a</sup> | 1.69±0.01 <sup>a</sup> | 2.70±0.00 <sup>a</sup> | 0.99994 |
| 20      | 3075.69±6.09 <sup>a</sup> | 3216.94±0.37 <sup>a</sup> | 3405.52±3.47 <sup>a</sup> | 3539.50±3.60 <sup>a</sup> | 3629.49±0.51 <sup>a</sup> | 1.68±0.01 <sup>a</sup> | 2.70±0.00 <sup>a</sup> | 0.99995 |
| Average | 3071.02±2.71              | 3217.75±1.01              | 3407.66±1.54              | 3540.51±2.15              | 3629.55±0.71              | 1.67±0.01              | 2.69±0.00              | 0.99995 |

<sup>a</sup> the same letter in a column indicates no significant difference (P<0.05) in each scanning.
